# Supplementary material
Source: ML conference proceedings conference paper supplement (https://proceedings.neurips.cc/paper_files/paper/2017/hash/05546b0e38ab9175cd905eebcc6ebb76-Abstract.html)
Supplement: Supplementary file 2 [file 05546b0e38ab9175cd905eebcc6ebb76-Supplemental.zip]

Archive with 1 entries (1 files):
- SUPPLEMENTARY - FALKON An optimal large scale kernel method.pdf
